# Supplementary material for: Metformin accelerates bone fracture healing by promoting type H vessel formation through inhibition of YAP1/TAZ expression
Source: PubMed Central journal article supplement (PMC10432554; doi:10.1038/s41413-023-00279-4), 2023-08-16

**Figure 3**

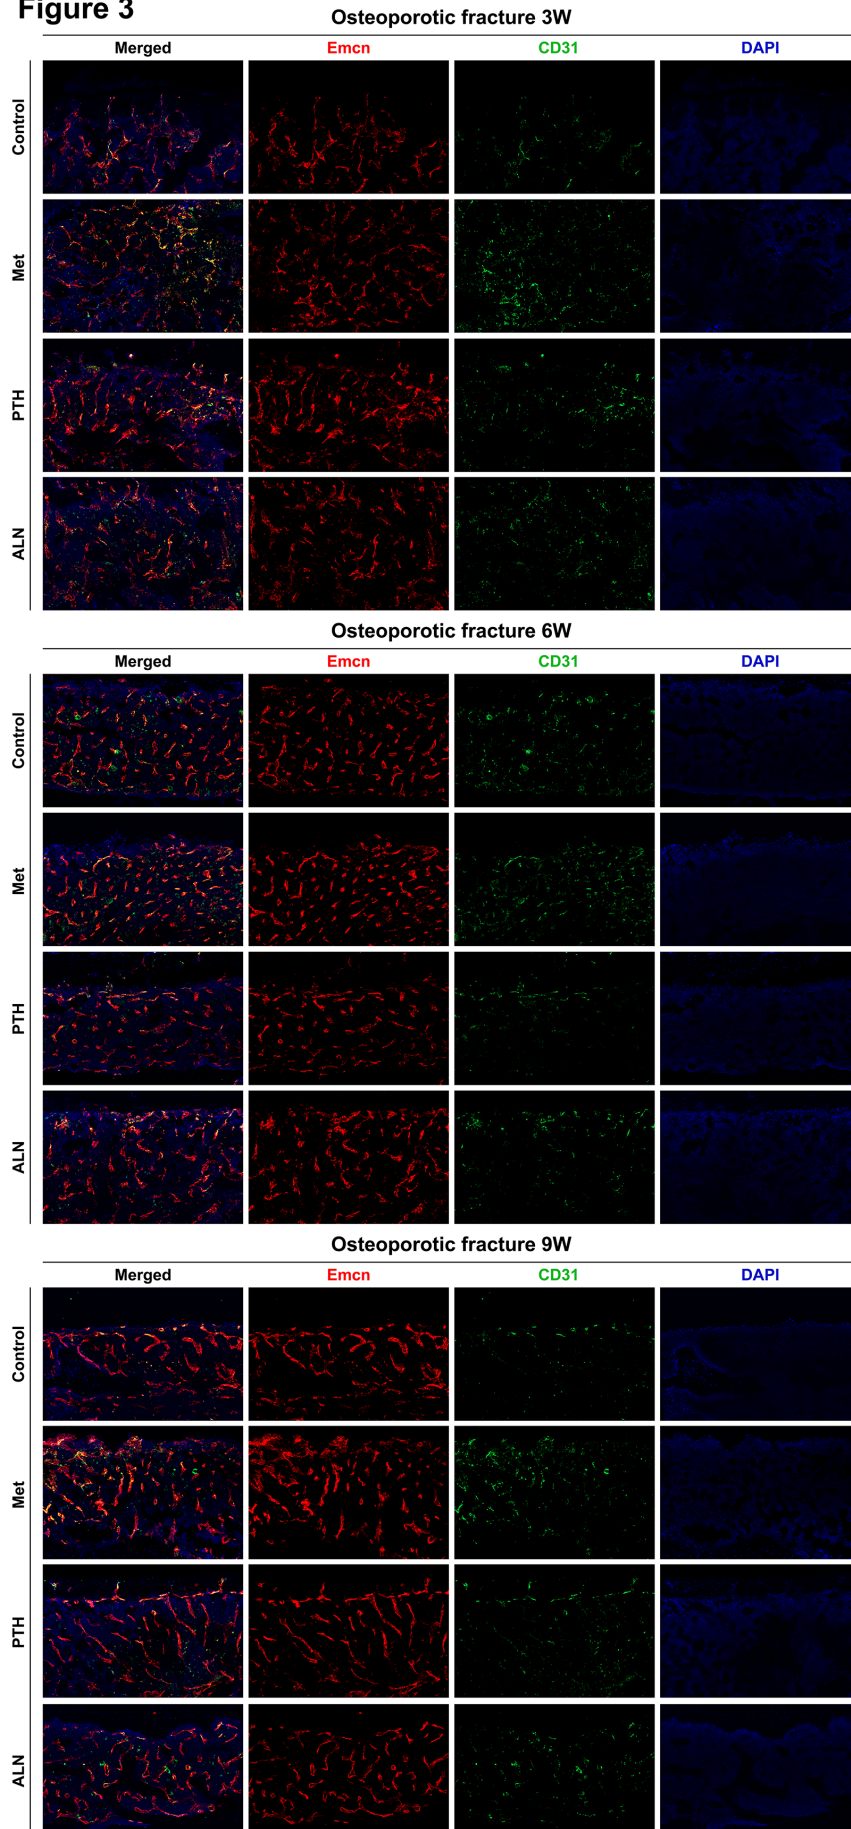

**Figure 3**

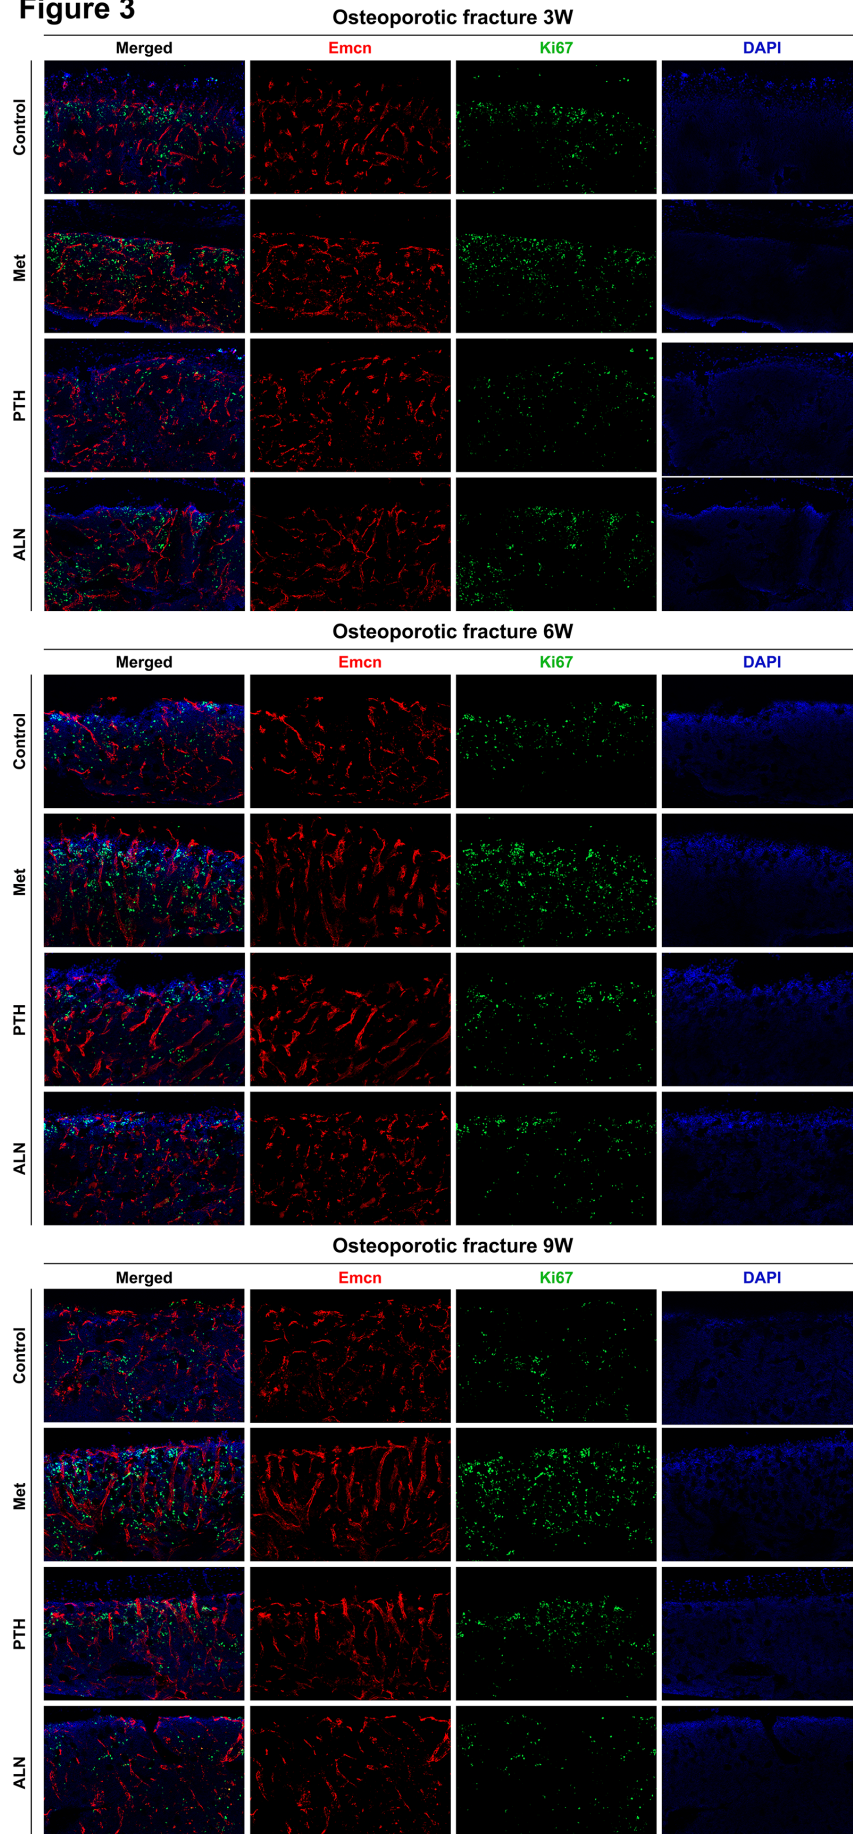

**Figure 5**

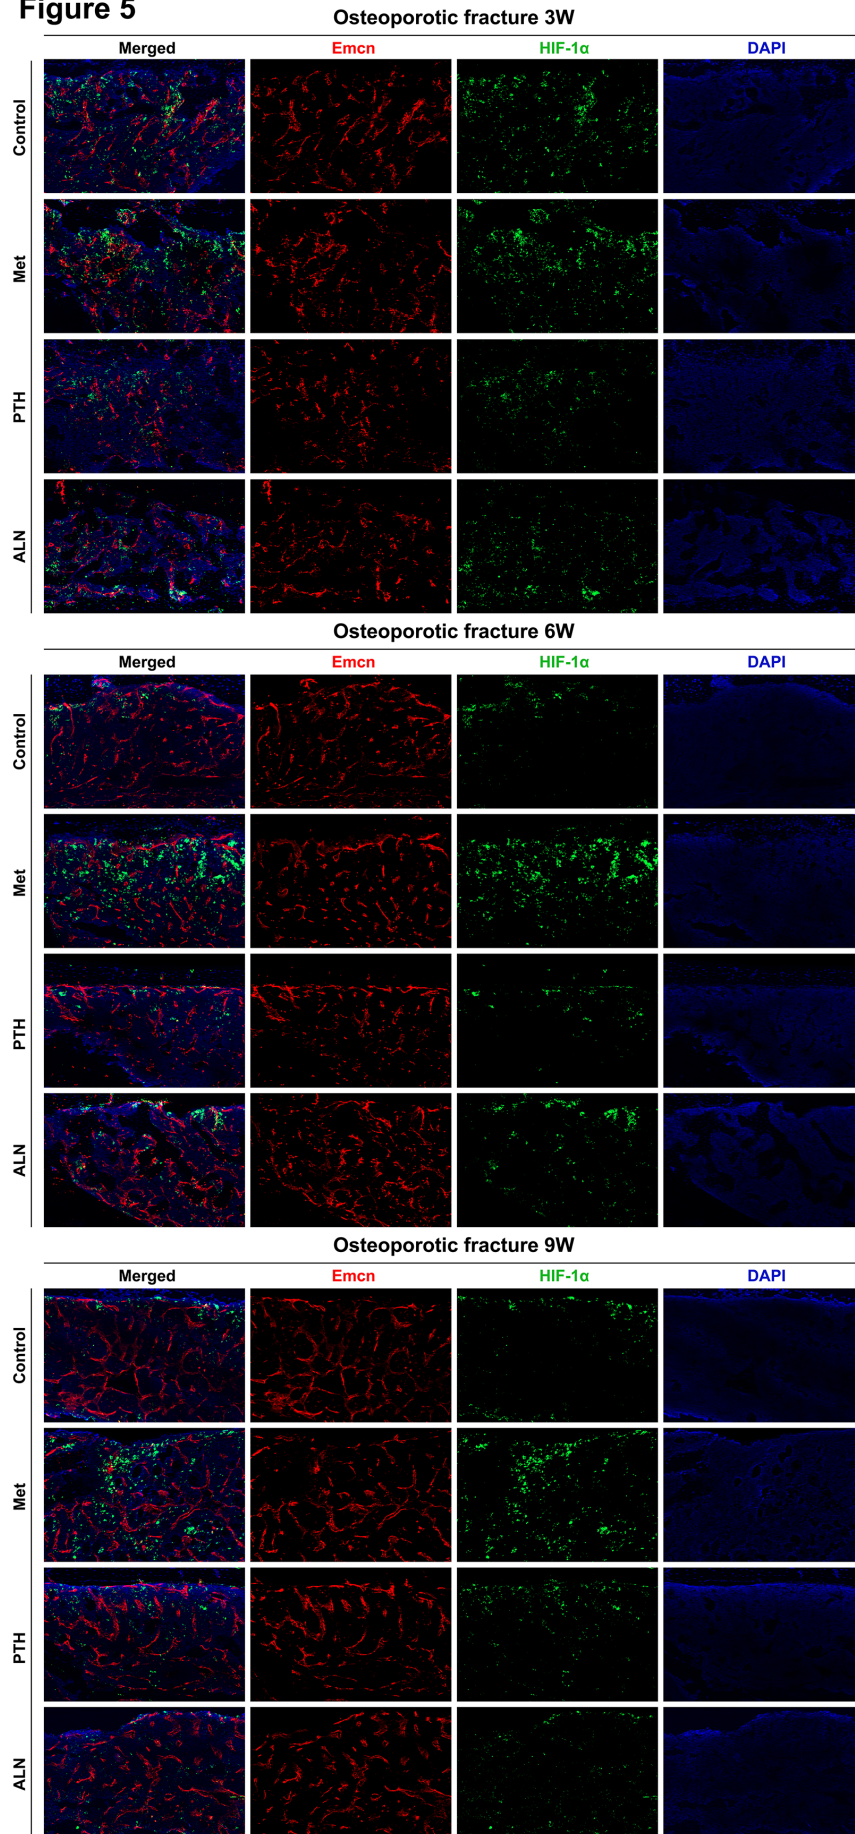

**Figure 5**

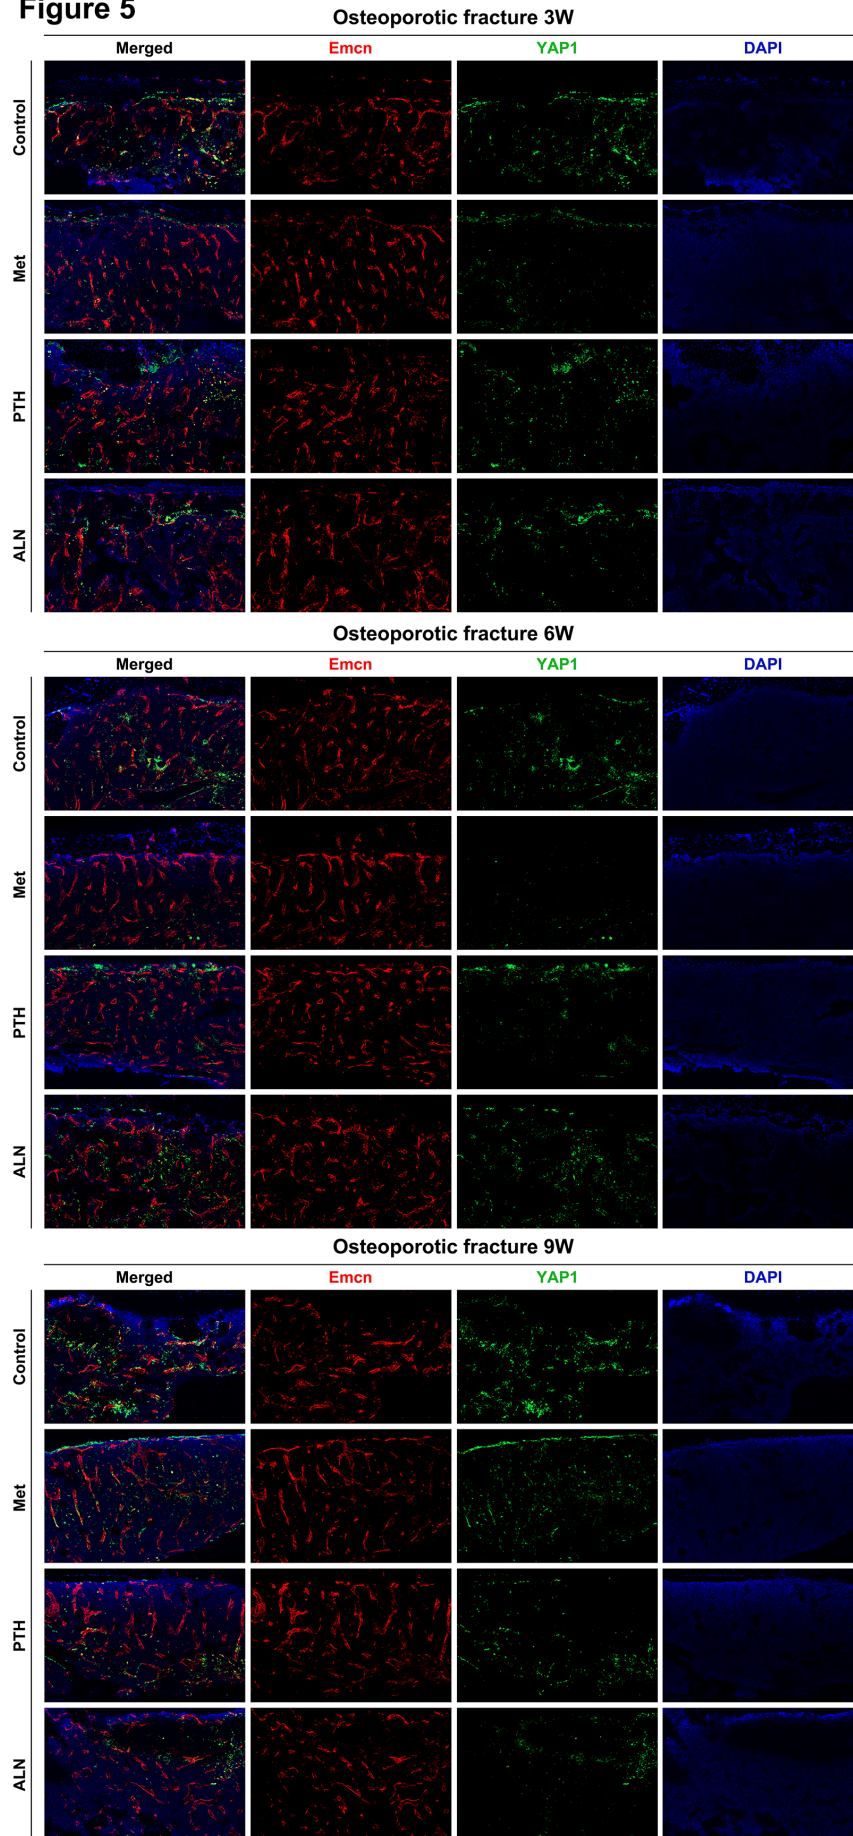

**Figure 5**

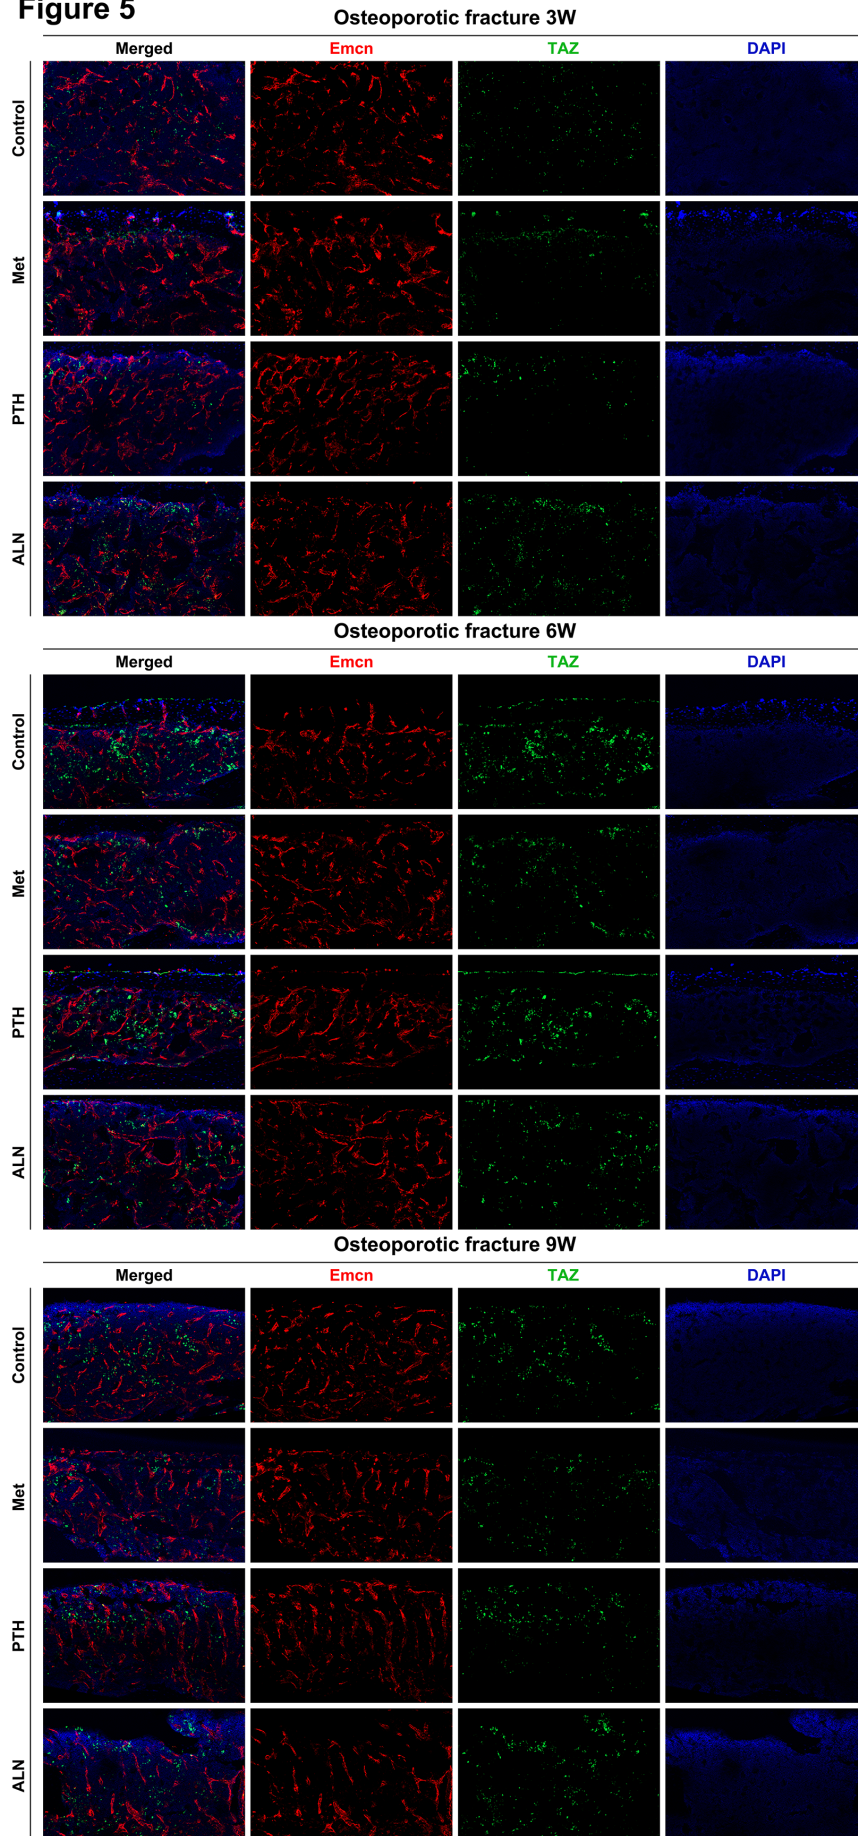

**Figure 6**

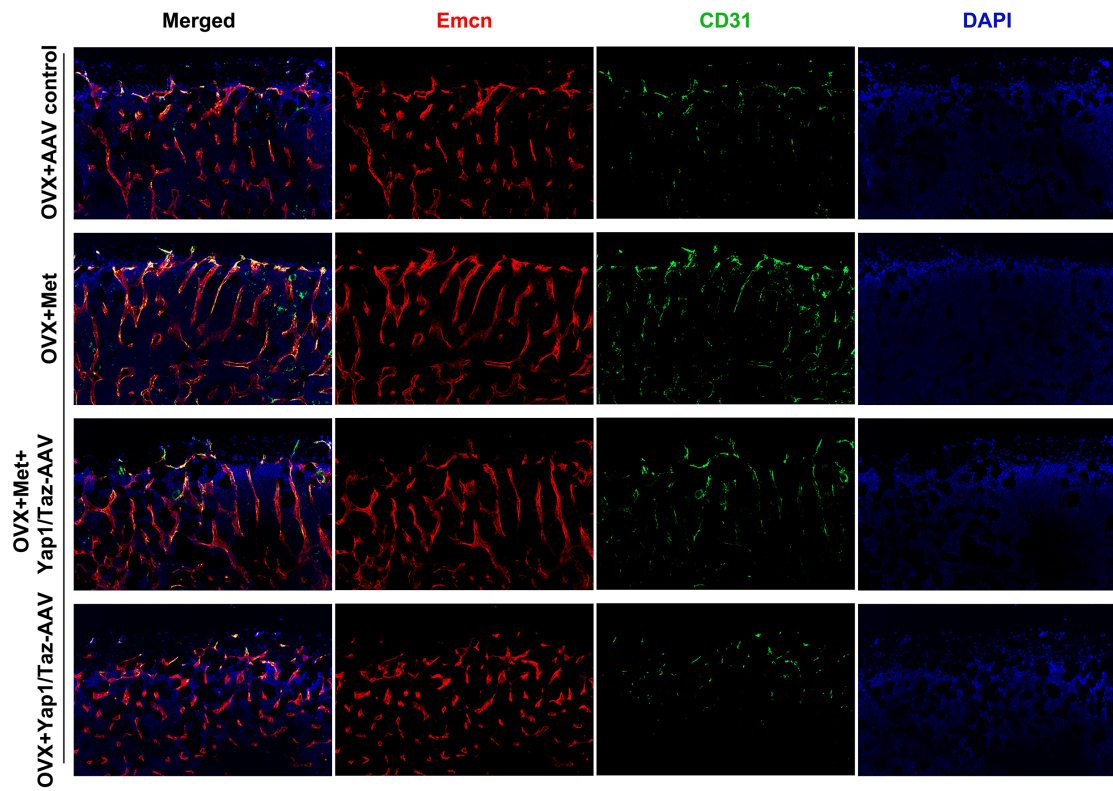

**Figure 6**

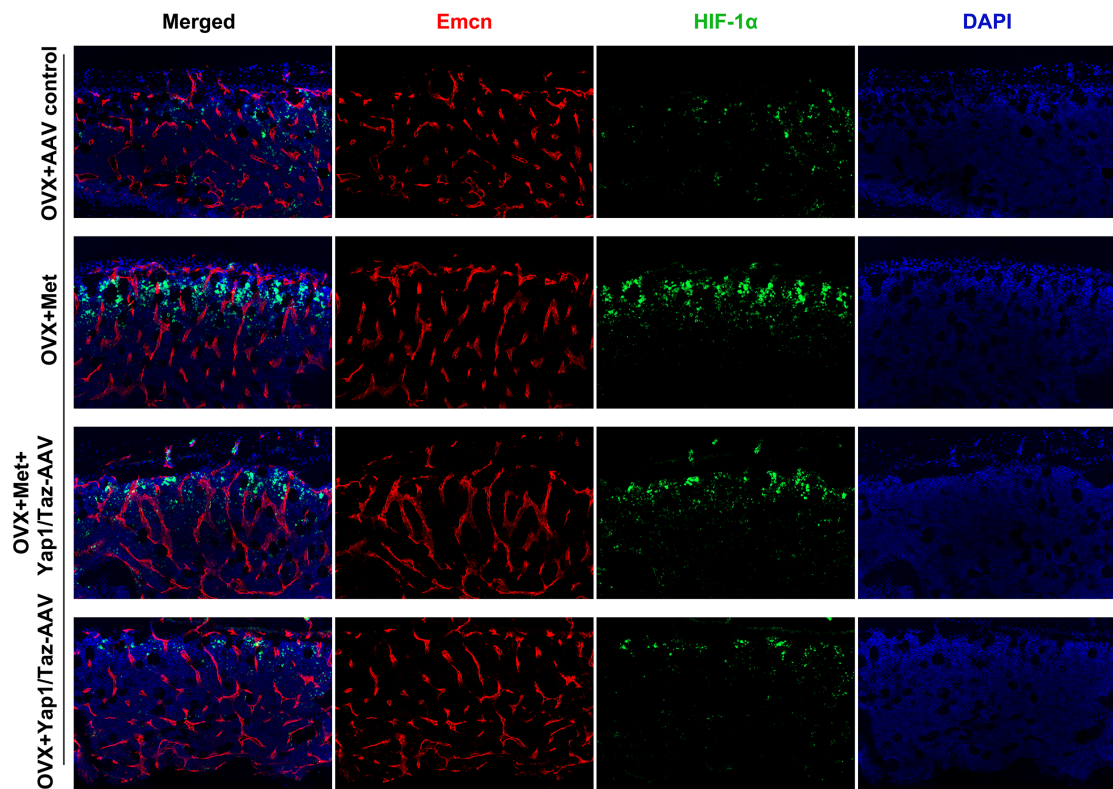

**Figure 6**

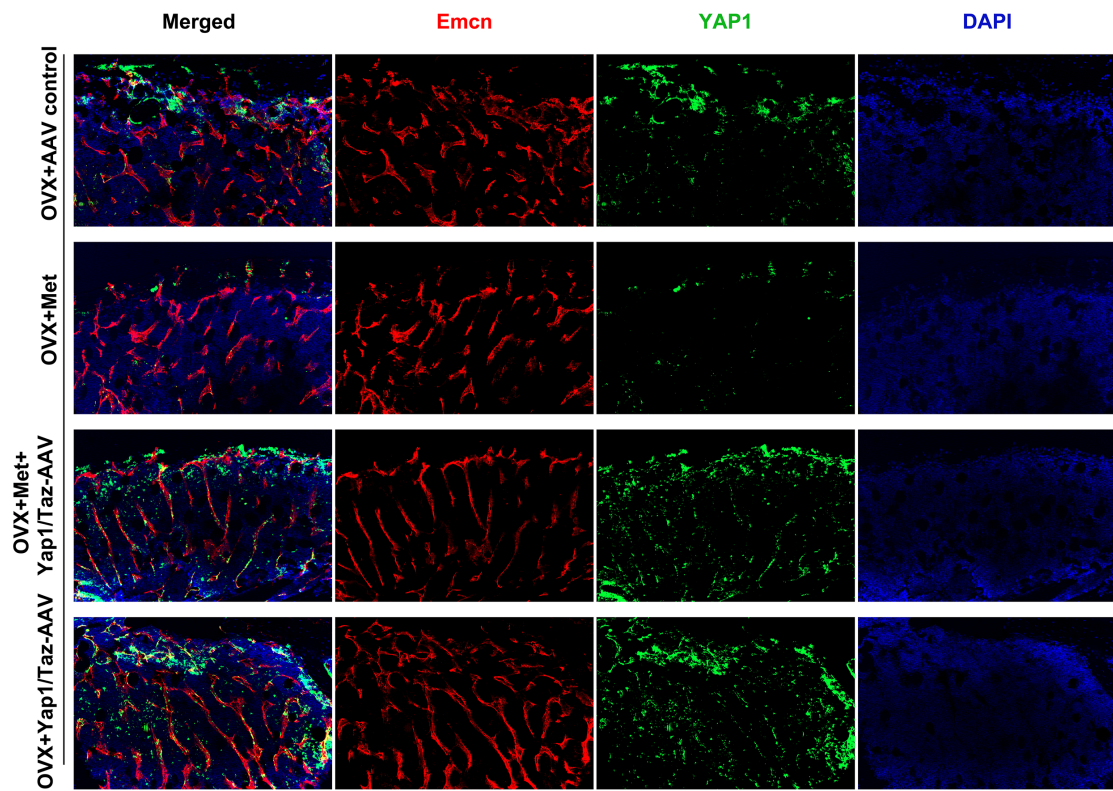

**Figure 6**

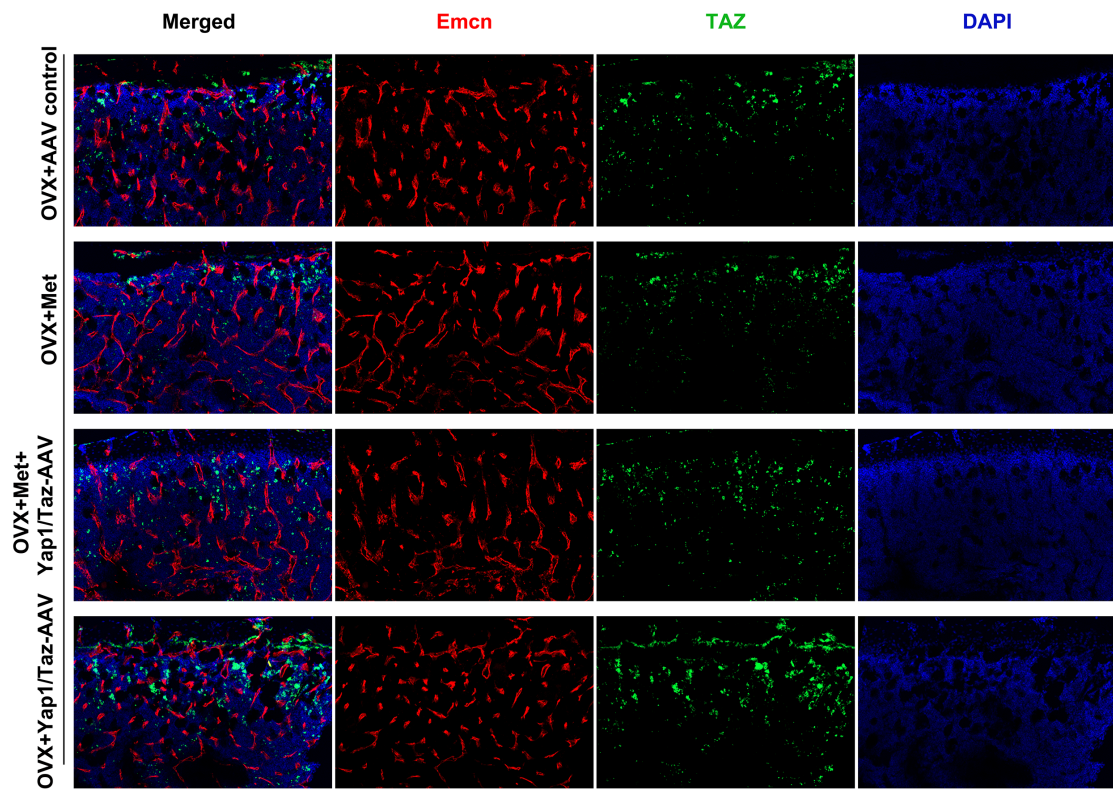

**Figure 6**

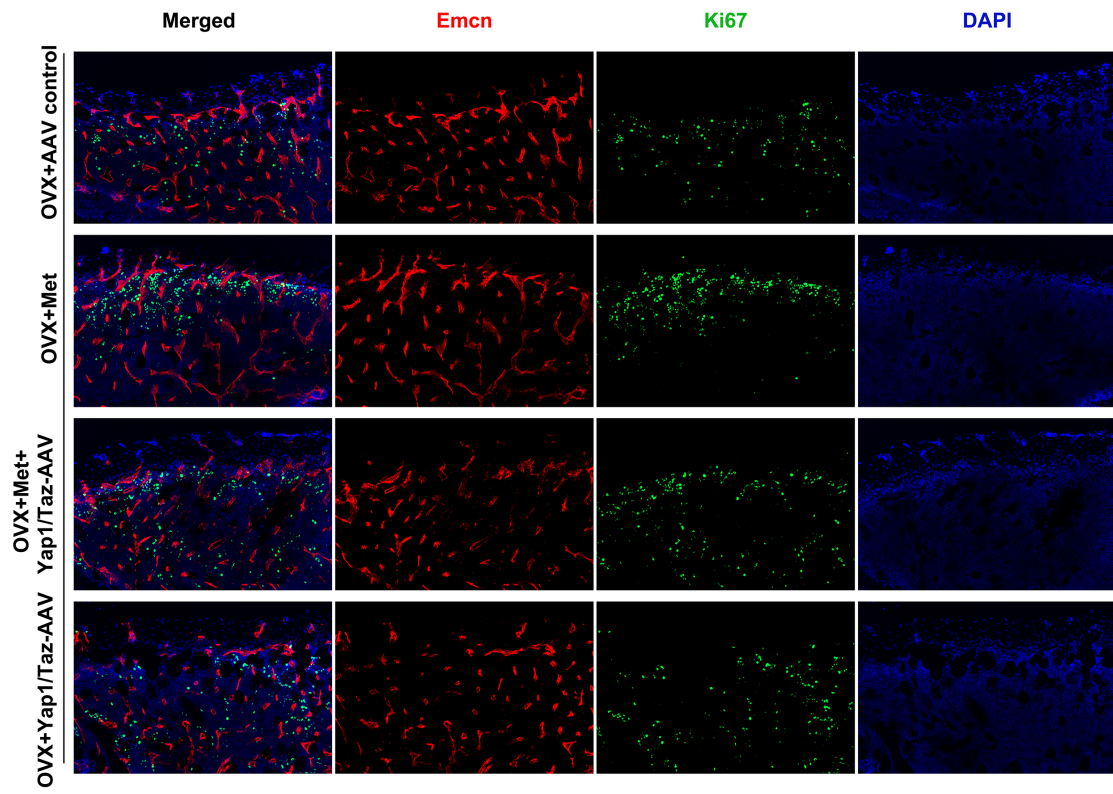



**Figure S3**

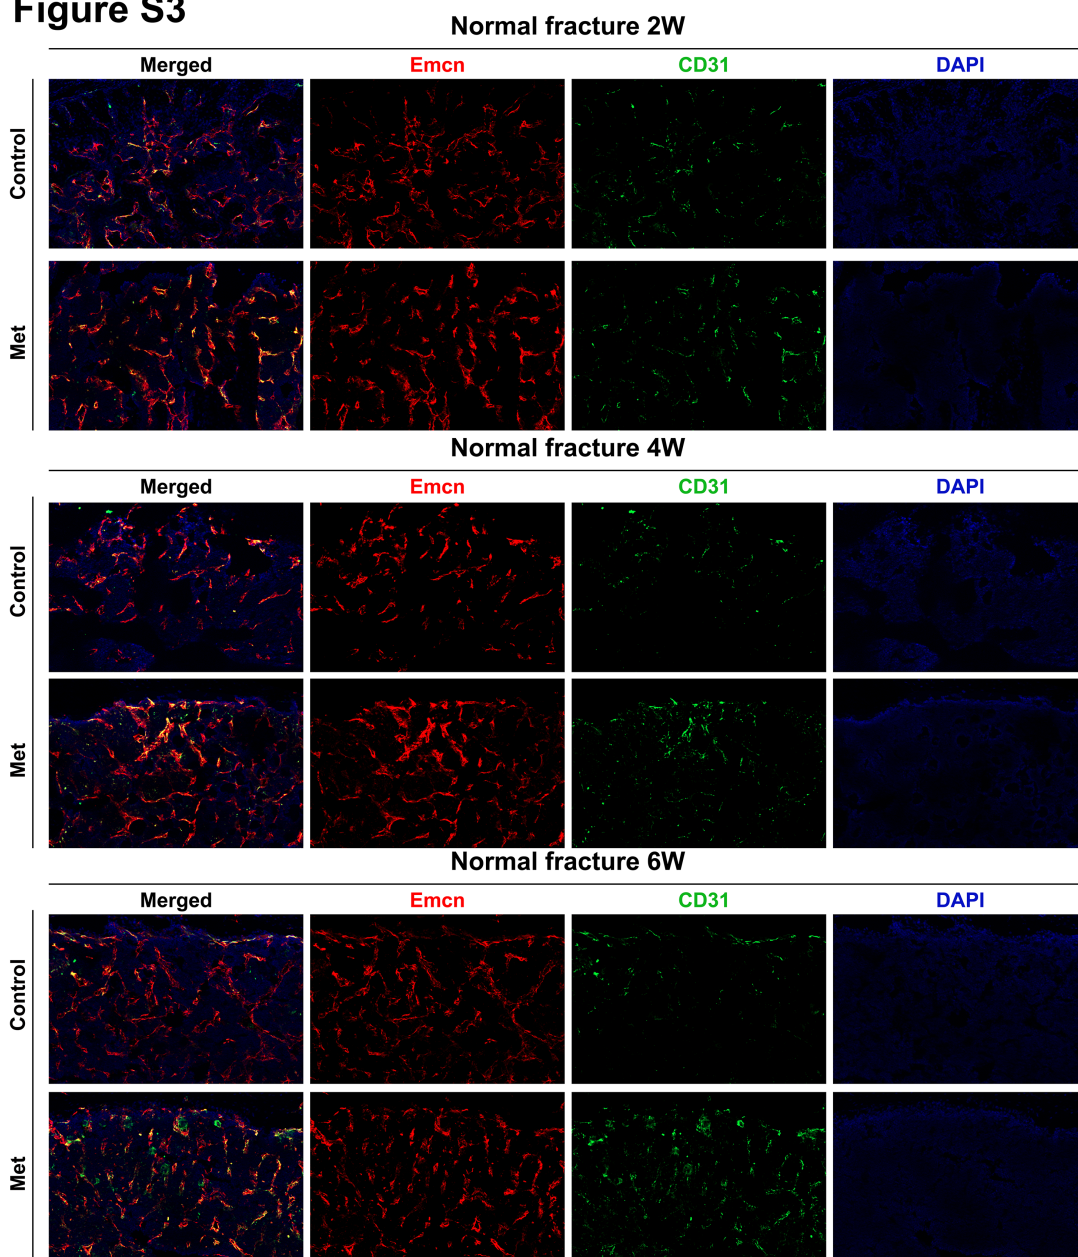

**Figure S3**

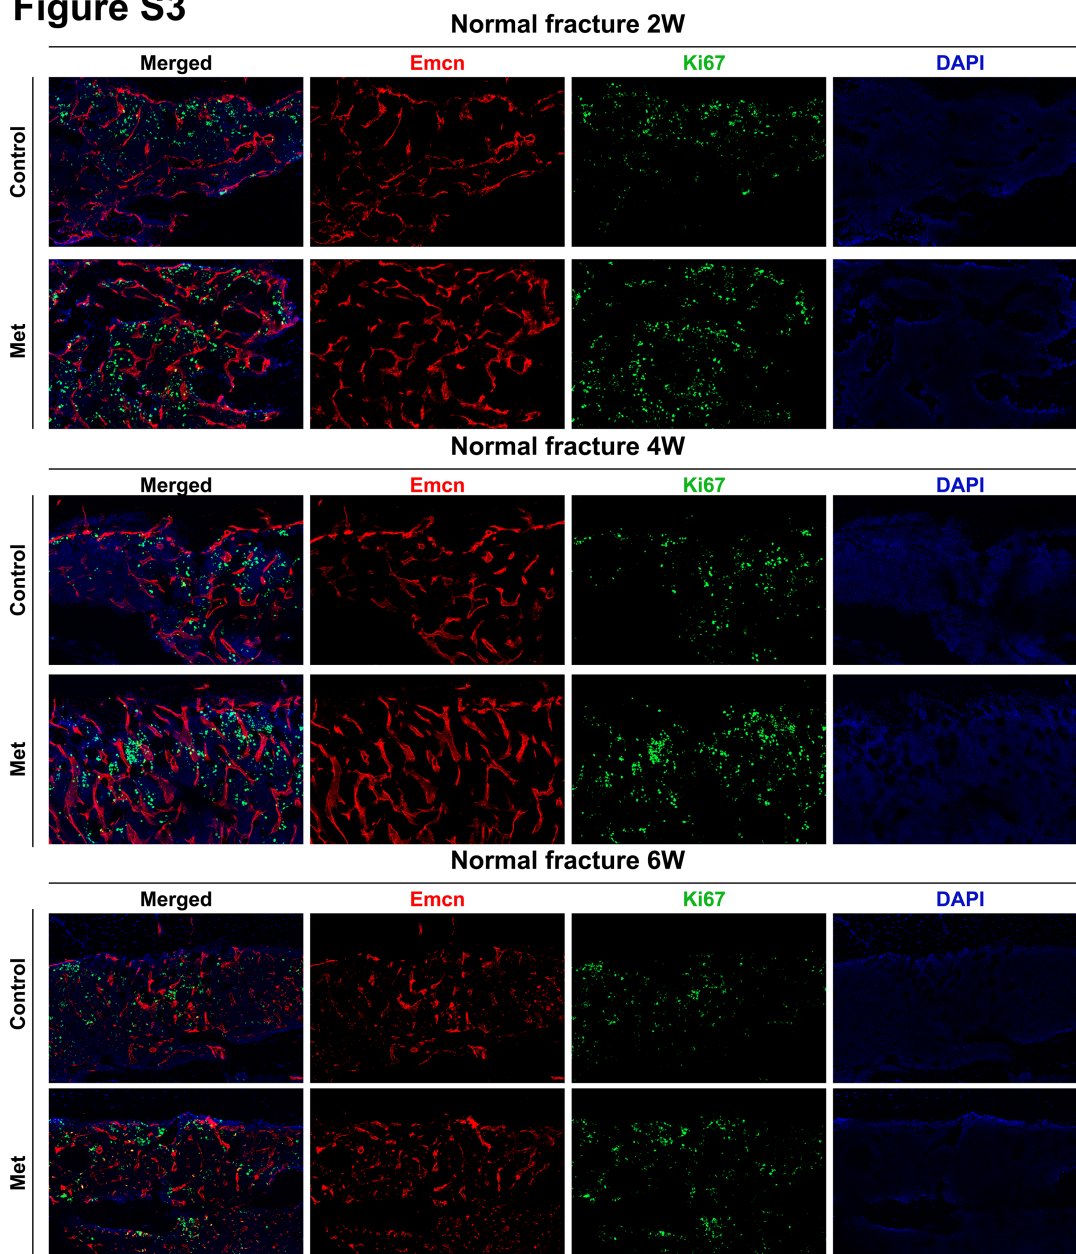

**Figure S4**

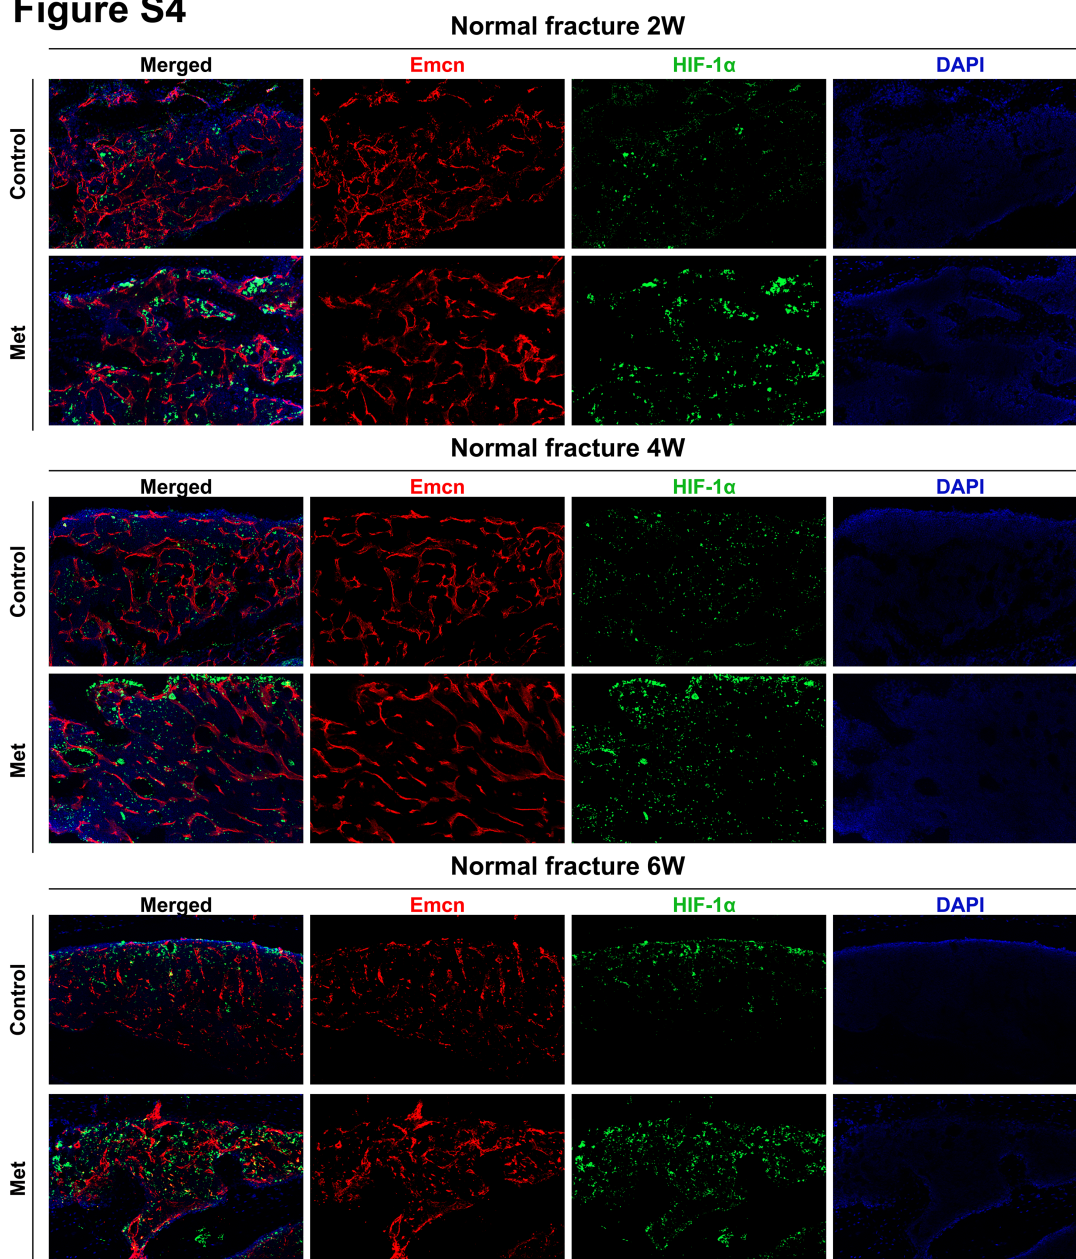

**Figure S4**

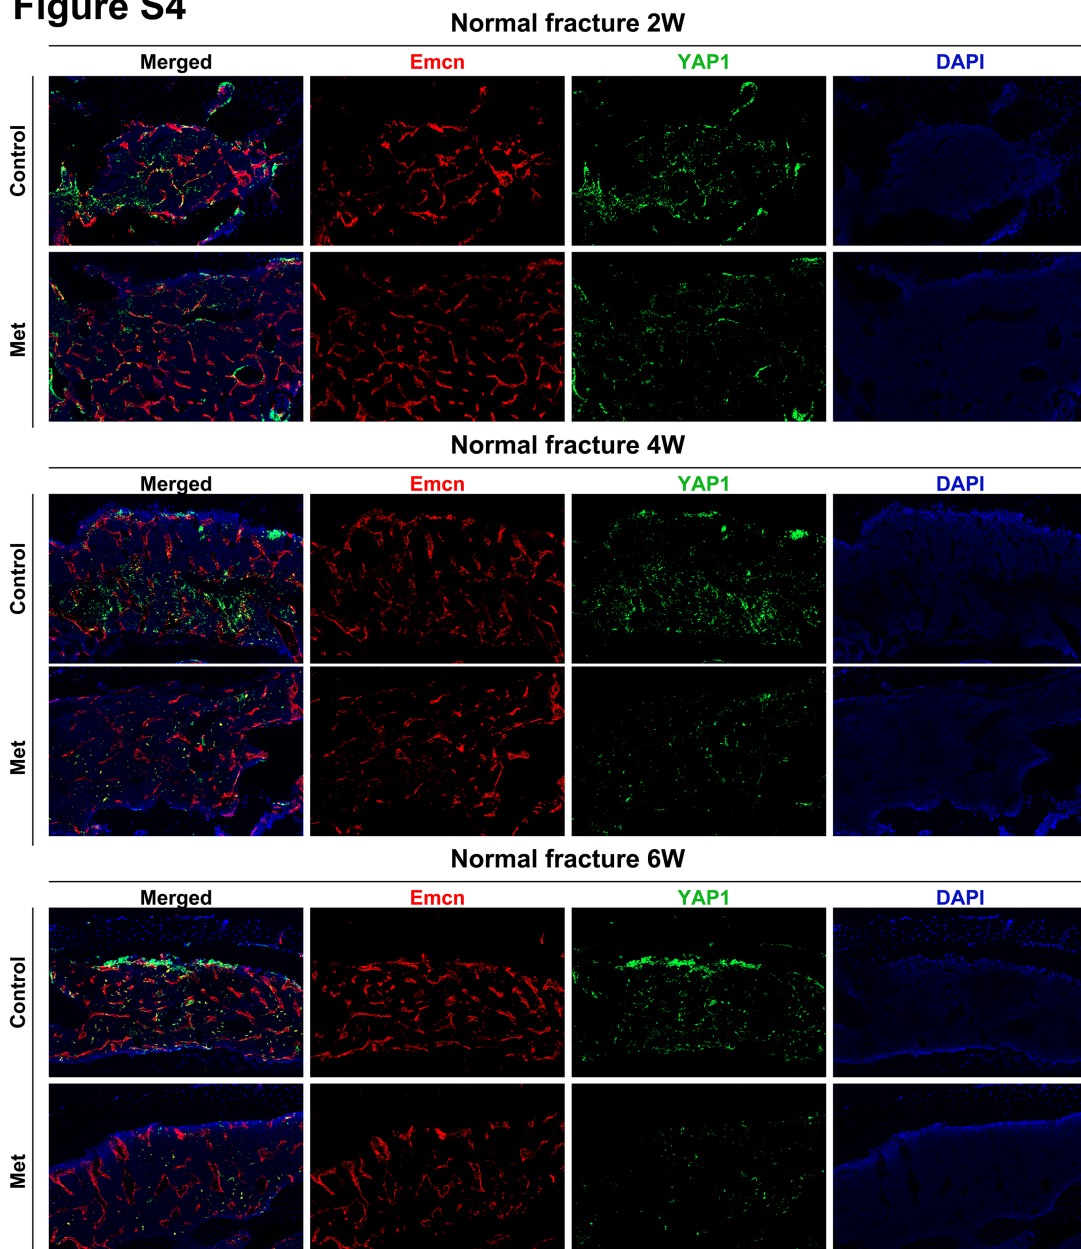

**Figure S4**

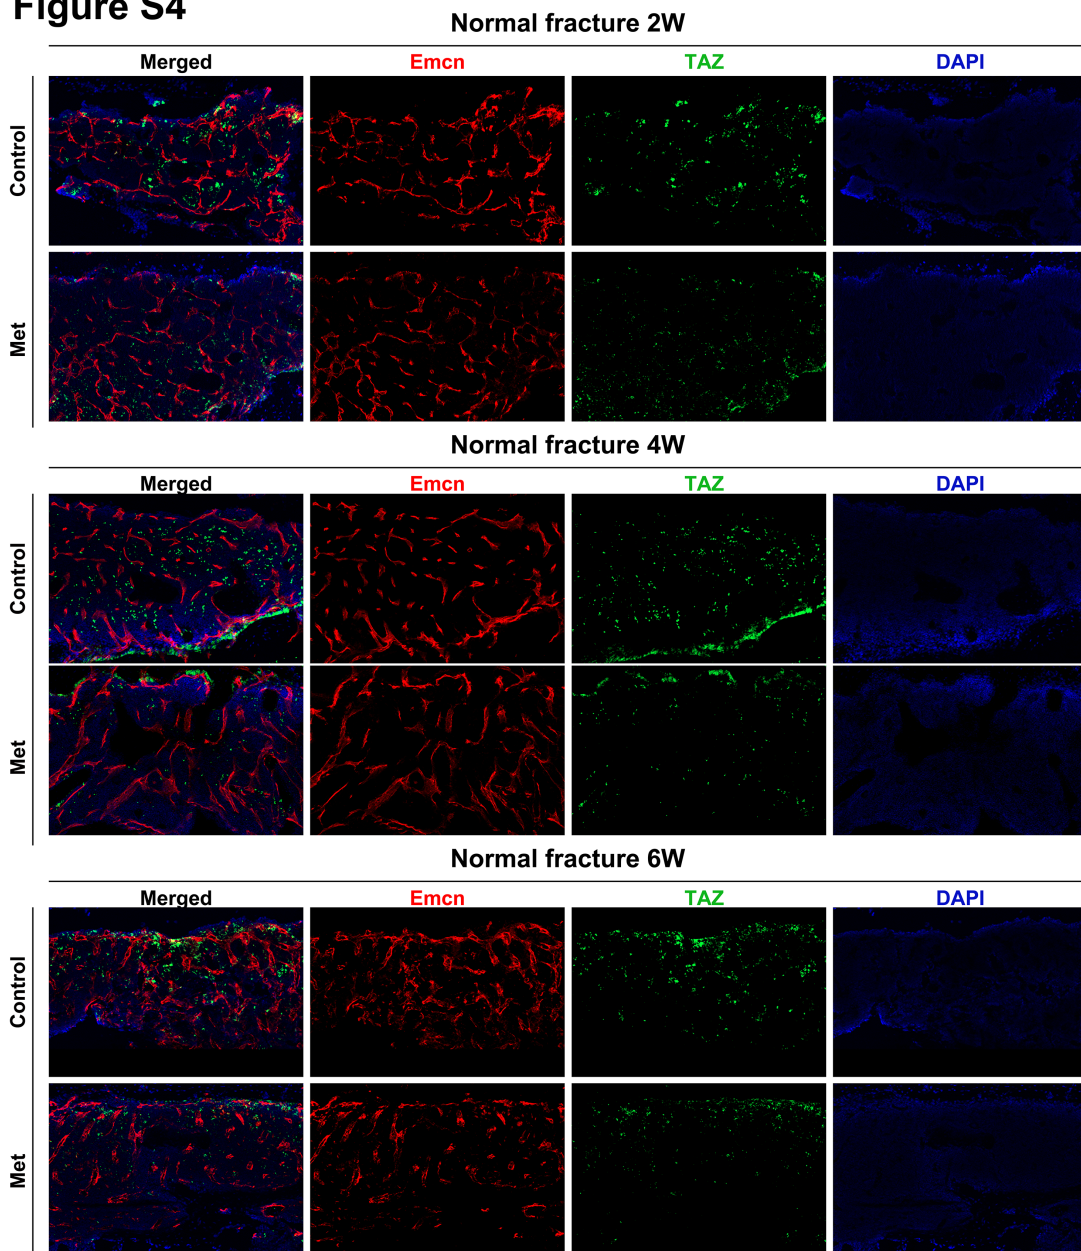

Supplement: 41413_2023_279_MOESM2_ESM.pdf [file 41413_2023_279_MOESM2_ESM.pdf]
